# Supplementary material for: Molecular basis of senescence transmitting in the population of human endometrial stromal cells
Source: publisher site journal article supplement (doi:10.18632/aging.102441), 2019-11-05
Supplement: Supplementary file [file aging-v11i21-102441-supplementary-material-SD1.pdf]

SUPPLEMENTARY FIGURE

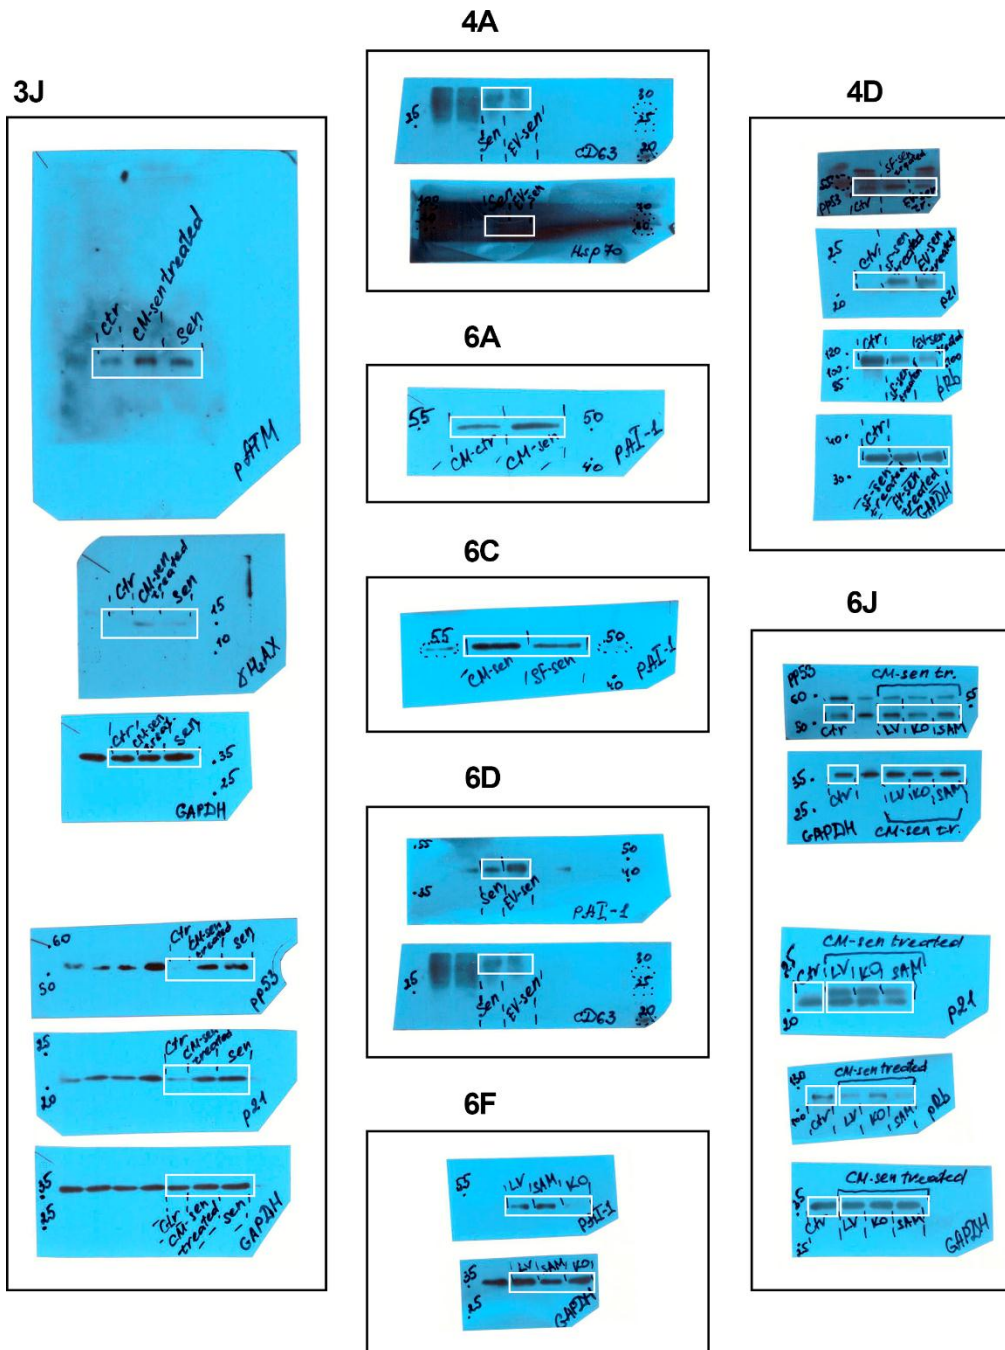

Supplementary Figure 1. Original (uncropped) scans of the representative blots displayed in the manuscript.
