# Supplementary material for: Molecular basis of senescence transmitting in the population of human endometrial stromal cells
Source: publisher site journal article supplement (doi:10.18632/aging.102441), 2019-11-05
Supplement: Supplementary file [file aging-v11i21-102441-supplementary-material-SD3.pdf]

Supplementary Table 2. Proteins detected uniquely in SEN ESCs secretome

| Identified Proteins (92)                                                          | Uniprot ID  | MW (kDa) | Condition (max # unique peptides) |     |
|-----------------------------------------------------------------------------------|-------------|----------|-----------------------------------|-----|
|                                                                                   |             |          | Ctrl                              | Sen |
| Multiple epidermal growth factor-like domains protein 8                           | MEGF8_HUMAN | 303      | 0                                 | 10  |
| Alpha-1,6-mannosylglycoprotein 6-beta-N-acetylglucosaminyltransferase A           | MGT5A_HUMAN | 85       | 0                                 | 9   |
| 3-hydroxyisobutyrate dehydrogenase, mitochondrial                                 | 3HIDH_HUMAN | 35       | 0                                 | 9   |
| Amphoterin-induced protein 2                                                      | AMGO2_HUMAN | 58       | 0                                 | 7   |
| Secreted frizzled-related protein 4                                               | SFRP4_HUMAN | 40       | 0                                 | 6   |
| Peroxiredoxin-5, mitochondrial                                                    | PRDX5_HUMAN | 22       | 0                                 | 6   |
| Ras GTPase-activating-like protein IQGAP1                                         | IQGA1_HUMAN | 189      | 0                                 | 6   |
| Myosin regulatory light polypeptide 9                                             | MYL9_HUMAN  | 20       | 0                                 | 6   |
| Leucine-rich repeat transmembrane protein FLRT2                                   | FLRT2_HUMAN | 74       | 0                                 | 6   |
| PDZ and LIM domain protein 4                                                      | PDLI4_HUMAN | 35       | 0                                 | 5   |
| Importin-5                                                                        | IPO5_HUMAN  | 124      | 0                                 | 5   |
| Translin-associated protein X                                                     | TSNAX_HUMAN | 33       | 0                                 | 5   |
| Tubulin beta chain                                                                | TBB5_HUMAN  | 50       | 0                                 | 5   |
| Serine/threonine-protein phosphatase 2A 65 kDa regulatory subunit A alpha isoform | 2AAA_HUMAN  | 65       | 0                                 | 5   |
| Adenylate kinase isoenzyme 1                                                      | KAD1_HUMAN  | 22       | 0                                 | 5   |
| Proteasome activator complex subunit 2                                            | PSME2_HUMAN | 27       | 0                                 | 5   |
| Glucosidase 2 subunit beta                                                        | GLU2B_HUMAN | 59       | 0                                 | 5   |
| Angiotensinogen                                                                   | ANGT_HUMAN  | 53       | 0                                 | 4   |
| Dynein light chain 1, cytoplasmic                                                 | DYL1_HUMAN  | 10       | 0                                 | 4   |
| Ubiquitin-conjugating enzyme E2 L3                                                | UB2L3_HUMAN | 18       | 0                                 | 4   |
| Calponin-1                                                                        | CNN1_HUMAN  | 33       | 0                                 | 4   |
| Peptidyl-prolyl cis-trans isomerase FKBP7                                         | FKBP7_HUMAN | 30       | 0                                 | 4   |
| Retinol-binding protein 1                                                         | RET1_HUMAN  | 16       | 0                                 | 4   |
| Intercellular adhesion molecule 5                                                 | ICAM5_HUMAN | 97       | 0                                 | 4   |
| Basal cell adhesion molecule                                                      | BCAM_HUMAN  | 67       | 0                                 | 4   |
| Glypican-4                                                                        | GPC4_HUMAN  | 62       | 0                                 | 4   |
| Copper transport protein ATOX1                                                    | ATOX1_HUMAN | 7        | 0                                 | 3   |
| Cullin-associated NEDD8-dissociated protein 1                                     | CAND1_HUMAN | 136      | 0                                 | 3   |
| Stromelysin-3                                                                     | MMP11_HUMAN | 55       | 0                                 | 3   |
| CD81 antigen                                                                      | CD81_HUMAN  | 26       | 0                                 | 3   |
| Histidine triad nucleotide-binding protein 1                                      | HINT1_HUMAN | 14       | 0                                 | 3   |
| Heat shock 70 kDa protein 13                                                      | HSP13_HUMAN | 52       | 0                                 | 3   |
| Tubulin-specific chaperone A                                                      | TBCA_HUMAN  | 13       | 0                                 | 3   |
| Serine/threonine-protein phosphatase 2A activator                                 | PTPA_HUMAN  | 41       | 0                                 | 3   |
| Rho GTPase-activating protein 1                                                   | RHG01_HUMAN | 50       | 0                                 | 3   |
| Podocan                                                                           | PODN_HUMAN  | 69       | 0                                 | 3   |

|                                                                  |             |     |   |   |
|------------------------------------------------------------------|-------------|-----|---|---|
| Latent-transforming growth factor beta-binding protein 3         | LTBP3_HUMAN | 139 | 0 | 3 |
| Polyadenylate-binding protein 1                                  | PABP1_HUMAN | 71  | 0 | 3 |
| Src substrate cortactin                                          | SRC8_HUMAN  | 62  | 0 | 3 |
| Sorting nexin-12                                                 | SNX12_HUMAN | 20  | 0 | 3 |
| Golgi membrane protein 1                                         | GOLM1_HUMAN | 45  | 0 | 3 |
| Programmed cell death 1 ligand 2                                 | PD1L2_HUMAN | 31  | 0 | 3 |
| Transcriptional activator protein Pur-alpha                      | PURA_HUMAN  | 35  | 0 | 3 |
| Hornerin                                                         | HORN_HUMAN  | 282 | 0 | 3 |
| Deoxycytidylate deaminase                                        | DCTD_HUMAN  | 20  | 0 | 3 |
| Palladin                                                         | PALLD_HUMAN | 151 | 0 | 3 |
| Insulin-like growth factor-binding protein-like 1                | IBPL1_HUMAN | 29  | 0 | 3 |
| Alpha-L-iduronidase                                              | IDUA_HUMAN  | 73  | 0 | 3 |
| Synaptic vesicle membrane protein VAT-1 homolog                  | VAT1_HUMAN  | 42  | 0 | 2 |
| Carboxypeptidase E                                               | CBPE_HUMAN  | 53  | 0 | 2 |
| Lysosomal acid phosphatase                                       | PPAL_HUMAN  | 48  | 0 | 2 |
| Inter-alpha-trypsin inhibitor heavy chain H2                     | ITIH2_HUMAN | 106 | 0 | 2 |
| Polymerase I and transcript release factor                       | PTRF_HUMAN  | 43  | 0 | 2 |
| Niban-like protein 1                                             | NIBL1_HUMAN | 84  | 0 | 2 |
| Protein phosphatase 1 regulatory subunit 7                       | PP1R7_HUMAN | 42  | 0 | 2 |
| Ubiquitin-fold modifier 1                                        | UFM1_HUMAN  | 9   | 0 | 2 |
| Layilin                                                          | LAYN_HUMAN  | 43  | 0 | 2 |
| Protocadherin Fat 4                                              | FAT4_HUMAN  | 543 | 0 | 2 |
| SLIT and NTRK-like protein 4                                     | SLIK4_HUMAN | 94  | 0 | 2 |
| Amyloid-like protein 2                                           | APLP2_HUMAN | 87  | 0 | 2 |
| Phospholipase D3                                                 | PLD3_HUMAN  | 55  | 0 | 2 |
| Isoamyl acetate-hydrolyzing esterase 1 homolog                   | IAH1_HUMAN  | 28  | 0 | 2 |
| Syntenin-1                                                       | SDCB1_HUMAN | 32  | 0 | 2 |
| Heme-binding protein 1                                           | HEBP1_HUMAN | 21  | 0 | 2 |
| Matrix Gla protein                                               | MGP_HUMAN   | 12  | 0 | 2 |
| Sulfatase-modifying factor 1                                     | SUMF1_HUMAN | 41  | 0 | 2 |
| Leucine-rich repeat-containing protein 59                        | LRC59_HUMAN | 35  | 0 | 2 |
| Tissue factor pathway inhibitor                                  | TFPI1_HUMAN | 35  | 0 | 2 |
| N-acetyllactosaminide beta-1,3-N-acetylglucosaminyltransferase   | B3GN1_HUMAN | 47  | 0 | 2 |
| Calponin-3                                                       | CNN3_HUMAN  | 36  | 0 | 2 |
| Cell adhesion molecule 1                                         | CADM1_HUMAN | 49  | 0 | 2 |
| Acid ceramidase                                                  | ASAH1_HUMAN | 45  | 0 | 2 |
| Protein FAM198B                                                  | F198B_HUMAN | 58  | 0 | 2 |
| PDZ and LIM domain protein 2                                     | PDLI2_HUMAN | 37  | 0 | 2 |
| Nucleolin                                                        | NUCL_HUMAN  | 77  | 0 | 2 |
| Transcription elongation factor B polypeptide 1                  | ELOC_HUMAN  | 12  | 0 | 2 |
| Apoptosis regulator BAX                                          | BAX_HUMAN   | 21  | 0 | 2 |
| Ras GTPase-activating protein-binding protein 1                  | G3BP1_HUMAN | 52  | 0 | 2 |
| A disintegrin and metalloproteinase with thrombospondin motifs 5 | ATS5_HUMAN  | 102 | 0 | 2 |
| HD domain-containing protein 2                                   | HDHC2_HUMAN | 23  | 0 | 2 |
| Tight junction protein ZO-1                                      | ZO1_HUMAN   | 195 | 0 | 2 |

|                                                             |             |     |   |   |
|-------------------------------------------------------------|-------------|-----|---|---|
| Apolipoprotein E                                            | APOE_HUMAN  | 36  | 0 | 2 |
| Hypoxia up-regulated protein 1                              | HYOU1_HUMAN | 111 | 0 | 2 |
| Magnesium-dependent phosphatase 1                           | MGDP1_HUMAN | 20  | 0 | 2 |
| Cadherin-13                                                 | CAD13_HUMAN | 78  | 0 | 2 |
| Growth/differentiation factor 15                            | GDF15_HUMAN | 34  | 0 | 2 |
| Actin-related protein 2/3 complex subunit 5-like protein    | ARP5L_HUMAN | 17  | 0 | 2 |
| Calcium-binding protein 39                                  | CAB39_HUMAN | 40  | 0 | 2 |
| Apoptosis-associated speck-like protein containing a CARD   | ASC_HUMAN   | 22  | 0 | 2 |
| Olfactomedin-like protein 2A                                | OLM2A_HUMAN | 73  | 0 | 2 |
| Dynactin subunit 2                                          | DCTN2_HUMAN | 44  | 0 | 2 |
| Alpha-N-acetylgalactosaminide alpha-2,6-sialyltransferase 5 | SIA7E_HUMAN | 38  | 0 | 2 |
