# Supplementary material for: Molecular basis of senescence transmitting in the population of human endometrial stromal cells
Source: publisher site journal article supplement (doi:10.18632/aging.102441), 2019-11-05
Supplement: Supplementary file [file aging-v11i21-102441-supplementary-material-SD5.pdf]

Supplementary Table 4. Proteins down-regulated in SEN ESCs secretome, quantified with at least 2 spectral counts (sc)

| Identified Proteins                               | Uniprot ID  | MW (kDa) | Condition |       | Ratio<br>Sen/Ctrl | p-value   |
|---------------------------------------------------|-------------|----------|-----------|-------|-------------------|-----------|
|                                                   |             |          | Ctrl      | Sen   |                   |           |
| Xaa-Pro dipeptidase                               | PEPD_HUMAN  | 55       | 39/14     | 3/2   | 0.05              | < 0.00010 |
| Soluble calcium-activated nucleotidase 1          | CANT1_HUMAN | 45       | 19/12     | 2/2   | 0.05              | < 0.00010 |
| Filamin-B                                         | FLNB_HUMAN  | 278      | 138/61    | 10/1  | 0.07              | < 0.00010 |
| Lactotransferrin                                  | TRFL_HUMAN  | 78       | 109/34    | 10/3  | 0.09              | < 0.00010 |
| Fascin                                            | FSCN1_HUMAN | 55       | 59/20     | 8/5   | 0.10              | < 0.00010 |
| Dihydrolipoyl dehydrogenase, mitochondrial        | DLDH_HUMAN  | 54       | 26/12     | 3/3   | 0.11              | < 0.00010 |
| Procollagen-lysine,2-oxoglutarate 5-dioxygenase 3 | PLOD3_HUMAN | 85       | 22/15     | 3/3   | 0.11              | < 0.00010 |
| Serum albumin                                     | ALBU_HUMAN  | 69       | 278/45    | 34/5  | 0.12              | < 0.00010 |
| Interstitial collagenase                          | MMP1_HUMAN  | 54       | 80/18     | 13/6  | 0.12              | < 0.00010 |
| WD repeat-containing protein 1                    | WDR1_HUMAN  | 66       | 42/20     | 5/3   | 0.12              | < 0.00010 |
| Serpin B7                                         | SPB7_HUMAN  | 43       | 24/12     | 5/3   | 0.12              | < 0.00010 |
| Lysozyme C                                        | LYSC_HUMAN  | 17       | 12/5      | 2/1   | 0.12              | < 0.00010 |
| Transketolase                                     | TKT_HUMAN   | 68       | 104/24    | 17/6  | 0.15              | < 0.00010 |
| Glutathione synthetase                            | GSHB_HUMAN  | 52       | 28/12     | 5/3   | 0.15              | < 0.00010 |
| Dihydropyrimidinase-related protein 2             | DPYL2_HUMAN | 62       | 14/11     | 2/2   | 0.15              | < 0.00010 |
| Secernin-1                                        | SCRN1_HUMAN | 46       | 11/6      | 2/2   | 0.15              | < 0.00010 |
| Heat shock 70 kDa protein 4                       | HSP74_HUMAN | 94       | 33/21     | 7/5   | 0.18              | < 0.00010 |
| Filamin-A                                         | FLNA_HUMAN  | 281      | 227/71    | 63/33 | 0.27              | < 0.00010 |
| Filamin-C                                         | FLNC_HUMAN  | 291      | 144/49    | 39/18 | 0.27              | < 0.00010 |
| Nidogen-1                                         | NID1_HUMAN  | 136      | 88/28     | 26/14 | 0.28              | < 0.00010 |
| Puromycin-sensitive aminopeptidase                | PSA_HUMAN   | 103      | 56/29     | 15/9  | 0.28              | < 0.00010 |
| Cathepsin L1                                      | CATL1_HUMAN | 38       | 20/7      | 6/1   | 0.29              | < 0.00010 |
| Thioredoxin reductase 1, cytoplasmic              | TRXR1_HUMAN | 71       | 116/27    | 35/13 | 0.31              | < 0.00010 |
| Rab GDP dissociation inhibitor alpha              | GDIA_HUMAN  | 51       | 67/15     | 24/4  | 0.36              | < 0.00010 |
| Purine nucleoside phosphorylase                   | PNPH_HUMAN  | 32       | 39/16     | 16/10 | 0.38              | < 0.00010 |
| Calsyntenin-1                                     | CSTN1_HUMAN | 110      | 113/32    | 46/16 | 0.40              | < 0.00010 |
| Tyrosine-protein kinase receptor UFO              | UFO_HUMAN   | 98       | 24/5      | 10/5  | 0.40              | < 0.00010 |

|                                                                  |             |     |        |        |      |           |
|------------------------------------------------------------------|-------------|-----|--------|--------|------|-----------|
| Collagen alpha-3(VI) chain                                       | CO6A3_HUMAN | 344 | 314/64 | 129/62 | 0.41 | < 0.00010 |
| Collagen alpha-1(XII) chain                                      | COCA1_HUMAN | 333 | 210/99 | 90/57  | 0.41 | < 0.00010 |
| 78 kDa glucose-regulated protein                                 | GRP78_HUMAN | 72  | 82/25  | 39/18  | 0.47 | < 0.00010 |
| Peroxidasin homolog                                              | PXDN_HUMAN  | 165 | 33/19  | 16/7   | 0.47 | < 0.00010 |
| Keratin, type II cytoskeletal 5                                  | K2C5_HUMAN  | 62  | 41/7   | 18/4   | 0.43 | 0.0001    |
| Keratin, type I cytoskeletal 14                                  | K1C14_HUMAN | 52  | 40/12  | 19/5   | 0.47 | 0.00014   |
| Aldose reductase                                                 | ALDR_HUMAN  | 36  | 15/6   | 2/1    | 0.14 | 0.00016   |
| Keratin, type II cytoskeletal 6C                                 | K2C6C_HUMAN | 60  | 35/11  | 17/2   | 0.49 | 0.00021   |
| Laminin subunit alpha-5                                          | LAMA5_HUMAN | 400 | 14/11  | 4/3    | 0.20 | 0.00021   |
| Dihydropteridine reductase                                       | DHPR_HUMAN  | 26  | 14/7   | 6/3    | 0.36 | 0.00023   |
| Serpin B6                                                        | SPB6_HUMAN  | 43  | 50/16  | 17/7   | 0.32 | 0.00025   |
| Actin-related protein 2/3 complex subunit 1B                     | ARC1B_HUMAN | 41  | 12/4   | 4/1    | 0.28 | 0.00033   |
| Cytosol aminopeptidase                                           | AMPL_HUMAN  | 56  | 26/16  | 9/7    | 0.30 | 0.00035   |
| Thyrotropin-releasing hormone-degrading ectoenzyme               | TRHDE_HUMAN | 117 | 24/15  | 6/4    | 0.23 | 0.00036   |
| Serpin H1                                                        | SERPH_HUMAN | 46  | 16/11  | 6/3    | 0.35 | 0.00036   |
| Serine/threonine-protein phosphatase PP1-alpha catalytic subunit | PP1A_HUMAN  | 38  | 38/14  | 6/6    | 0.06 | 0.00039   |
| Actin-related protein 2/3 complex subunit 2                      | ARPC2_HUMAN | 34  | 28/14  | 2/2    | 0.07 | 0.0004    |
| Transcobalamin-2                                                 | TCO2_HUMAN  | 48  | 15/9   | 4/3    | 0.13 | 0.00044   |
| Heat shock 70 kDa protein 1A/1B                                  | HSP71_HUMAN | 70  | 26/13  | 10/3   | 0.35 | 0.00045   |
| Prolyl endopeptidase FAP                                         | SEPR_HUMAN  | 88  | 12/7   | 5/3    | 0.35 | 0.00049   |
| Neuropilin-2                                                     | NRP2_HUMAN  | 105 | 25/16  | 11/6   | 0.46 | 0.00067   |
| Putative GTP cyclohydrolase 1 type 2 NIF3L1                      | GTPC1_HUMAN | 42  | 9/6    | 2/2    | 0.20 | 0.00068   |
| Actin-related protein 3                                          | ARP3_HUMAN  | 47  | 31/17  | 15/8   | 0.45 | 0.00071   |
| Keratin, type I cytoskeletal 16                                  | K1C16_HUMAN | 51  | 37/4   | 17/1   | 0.44 | 0.00078   |
| Moesin                                                           | MOES_HUMAN  | 68  | 62/21  | 9/5    | 0.10 | 0.00079   |
| Prolactin-inducible protein                                      | PIP_HUMAN   | 17  | 11/6   | 3/3    | 0.15 | 0.00089   |
| Growth arrest-specific protein 6                                 | GAS6_HUMAN  | 80  | 13/7   | 7/5    | 0.47 | 0.0011    |
| Acylpyruvase FAHD1, mitochondrial                                | FAHD1_HUMAN | 25  | 12/4   | 4/3    | 0.27 | 0.0012    |
| Actin-related protein 2                                          | ARP2_HUMAN  | 45  | 18/9   | 7/4    | 0.22 | 0.0014    |
| S-formylglutathione hydrolase                                    | ESTD_HUMAN  | 31  | 6/6    | 2/2    | 0.17 | 0.0014    |
| AP-2 complex subunit beta                                        | AP2B1_HUMAN | 105 | 5/4    | 2/2    | 0.43 | 0.0015    |
| Rab GDP dissociation inhibitor beta                              | GDIB_HUMAN  | 51  | 71/25  | 35/10  | 0.46 | 0.0016    |

|                                                                 |             |     |       |       |      |        |
|-----------------------------------------------------------------|-------------|-----|-------|-------|------|--------|
| Serine/threonine-protein phosphatase PP1-beta catalytic subunit | PP1B_HUMAN  | 37  | 35/4  | 8/7   | 0.14 | 0.0016 |
| Glyoxalase domain-containing protein 4                          | GLOD4_HUMAN | 35  | 16/9  | 10/7  | 0.47 | 0.0019 |
| Serine/threonine-protein phosphatase CPPED1                     | CPPED_HUMAN | 36  | 16/10 | 6/5   | 0.30 | 0.0022 |
| Dipeptidyl peptidase 1                                          | CATC_HUMAN  | 52  | 22/8  | 5/3   | 0.20 | 0.0022 |
| Dipeptidyl peptidase 3                                          | DPP3_HUMAN  | 83  | 42/22 | 13/10 | 0.32 | 0.0027 |
| Hemoglobin subunit beta                                         | HBB_HUMAN   | 16  | 6/3   | 2/2   | 0.22 | 0.0027 |
| Hydroxyacylglutathione hydrolase, mitochondrial                 | GLO2_HUMAN  | 34  | 8/6   | 5/3   | 0.48 | 0.0031 |
| EGF-containing fibulin-like extracellular matrix protein 2      | FBLN4_HUMAN | 49  | 14/10 | 5/4   | 0.25 | 0.0032 |
| Coronin-1C                                                      | COR1C_HUMAN | 53  | 10/7  | 2/2   | 0.15 | 0.0036 |
| Peptidyl-prolyl cis-trans isomerase-like 3                      | PPIL3_HUMAN | 18  | 9/6   | 5/4   | 0.46 | 0.0046 |
| Ribosyldihydronicotinamide dehydrogenase [quinone]              | NQO2_HUMAN  | 26  | 10/6  | 4/4   | 0.27 | 0.005  |
| Chitinase domain-containing protein 1                           | CHID1_HUMAN | 45  | 26/13 | 11/7  | 0.44 | 0.0051 |
| 3'(2'),5'-bisphosphate nucleotidase 1                           | BPNT1_HUMAN | 33  | 10/9  | 4/4   | 0.43 | 0.0051 |
| Fumarylacetoacetase                                             | FAAA_HUMAN  | 46  | 12/9  | 6/6   | 0.34 | 0.0058 |
| Proteasome subunit alpha type-6                                 | PSA6_HUMAN  | 27  | 6/5   | 3/2   | 0.29 | 0.0064 |
| Transitional endoplasmic reticulum ATPase                       | TERA_HUMAN  | 89  | 15/11 | 7/5   | 0.42 | 0.0089 |
| Adenylosuccinate synthetase isozyme 2                           | PURA2_HUMAN | 50  | 6/5   | 3/3   | 0.29 | 0.013  |
| Tumor necrosis factor receptor superfamily member 27            | TNR27_HUMAN | 33  | 4/3   | 2/2   | 0.46 | 0.013  |
| 60S ribosomal protein L10a                                      | RL10A_HUMAN | 25  | 20/6  | 5/5   | 0.24 | 0.014  |
| NADP-dependent malic enzyme                                     | MAOX_HUMAN  | 64  | 15/11 | 8/5   | 0.43 | 0.015  |
| Ras-related protein Rab-7a                                      | RAB7A_HUMAN | 23  | 15/9  | 2/2   | 0.16 | 0.017  |
| Proteasome subunit alpha type-7                                 | PSA7_HUMAN  | 28  | 5/5   | 2/2   | 0.21 | 0.017  |
| 40S ribosomal protein SA                                        | RSSA_HUMAN  | 33  | 3/3   | 2/1   | 0.31 | 0.017  |
| Proteasome subunit beta type-1                                  | PSB1_HUMAN  | 26  | 11/8  | 7/6   | 0.40 | 0.02   |
| Cathepsin K                                                     | CATK_HUMAN  | 37  | 6/4   | 2/2   | 0.20 | 0.022  |
| Protocadherin-10                                                | PCD10_HUMAN | 113 | 9/8   | 4/4   | 0.49 | 0.026  |
| Adenylyl cyclase-associated protein 1                           | CAP1_HUMAN  | 52  | 13/8  | 7/4   | 0.50 | 0.033  |
| Angiogenin                                                      | ANGI_HUMAN  | 17  | 9/3   | 5/3   | 0.47 | 0.033  |

|                                                                |             |     |     |     |      |       |
|----------------------------------------------------------------|-------------|-----|-----|-----|------|-------|
| Disintegrin and metalloproteinase domain-containing protein 19 | ADA19_HUMAN | 105 | 7/4 | 5/3 | 0.46 | 0.036 |
|----------------------------------------------------------------|-------------|-----|-----|-----|------|-------|

Proteins down-regulated in SEN ESCs secretome, quantified with at least 1 spectral counts (sc)

| Identified Proteins                                         | Uniprot ID  | MW (kDa) | Condition                   |     | Ratio<br>Sen/Ctrl | p-value |
|-------------------------------------------------------------|-------------|----------|-----------------------------|-----|-------------------|---------|
|                                                             |             |          | (max # sc/peptides)<br>Ctrl | Sen |                   |         |
| Leukocyte elastase inhibitor                                | ILEU_HUMAN  | 43       | 24/13                       | 1/1 | 0.01              | 0.00019 |
| Bleomycin hydrolase                                         | BLMH_HUMAN  | 53       | 7/3                         | 1/1 | 0.09              | 0.00023 |
| Inositol monophosphatase 1                                  | IMPA1_HUMAN | 30       | 12/10                       | 1/1 | 0.06              | 0.00024 |
| Intraflagellar transport protein 25 homolog                 | IFT25_HUMAN | 16       | 6/5                         | 1/1 | 0.05              | 0.00035 |
| Enolase-phosphatase E1                                      | ENOPH_HUMAN | 29       | 11/7                        | 1/1 | 0.04              | 0.00058 |
| Omega-amidase NIT2                                          | NIT2_HUMAN  | 31       | 7/7                         | 1/1 | 0.05              | 0.00068 |
| Gamma-glutamylcyclotransferase                              | GGCT_HUMAN  | 21       | 11/7                        | 1/1 | 0.03              | 0.00088 |
| Enoyl-CoA delta isomerase 1, mitochondrial                  | ECI1_HUMAN  | 33       | 3/2                         | 1/1 | 0.10              | 0.00095 |
| Proteasome subunit beta type-2                              | PSB2_HUMAN  | 23       | 5/4                         | 1/1 | 0.13              | 0.001   |
| Phosphoglucomutase-2                                        | PGM2_HUMAN  | 68       | 17/10                       | 1/1 | 0.02              | 0.0018  |
| S-adenosylmethionine synthase isoform type-2                | METK2_HUMAN | 44       | 8/8                         | 1/1 | 0.05              | 0.0019  |
| Ephrin type-A receptor 5                                    | EPHA5_HUMAN | 115      | 4/3                         | 1/1 | 0.08              | 0.0019  |
| Pyridoxal kinase                                            | PDXK_HUMAN  | 35       | 11/7                        | 1/1 | 0.04              | 0.0039  |
| Secreted and transmembrane protein 1                        | SCTM1_HUMAN | 27       | 5/3                         | 1/1 | 0.08              | 0.0041  |
| Collagen alpha-1(VII) chain                                 | CO7A1_HUMAN | 295      | 25/12                       | 1/1 | 0.02              | 0.0047  |
| Destrin                                                     | DEST_HUMAN  | 19       | 8/6                         | 1/1 | 0.15              | 0.0049  |
| Pantetheinase                                               | VNN1_HUMAN  | 57       | 3/2                         | 1/1 | 0.35              | 0.0049  |
| Hemopexin                                                   | HEMO_HUMAN  | 52       | 3/3                         | 1/1 | 0.35              | 0.0049  |
| Methionine adenosyltransferase 2 subunit beta               | MAT2B_HUMAN | 38       | 6/5                         | 1/1 | 0.20              | 0.0068  |
| Platelet-activating factor acetylhydrolase IB subunit alpha | LIS1_HUMAN  | 47       | 3/2                         | 1/1 | 0.12              | 0.0076  |
| EMILIN-2                                                    | EMIL2_HUMAN | 116      | 3/2                         | 1/1 | 0.12              | 0.0079  |
| Spectrin beta chain, non-erythrocytic 1                     | SPTB2_HUMAN | 275      | 3/3                         | 1/1 | 0.40              | 0.011   |
| Selenoprotein M                                             | SELM_HUMAN  | 16       | 2/2                         | 1/1 | 0.31              | 0.012   |

|                                                 |            |     |     |     |      |       |
|-------------------------------------------------|------------|-----|-----|-----|------|-------|
| D-tyrosyl-tRNA(Tyr)<br>deacylase 1              | DTD1_HUMAN | 23  | 3/2 | 1/1 | 0.26 | 0.017 |
| Elongation factor 2                             | EF2_HUMAN  | 95  | 4/3 | 1/1 | 0.11 | 0.018 |
| Ubiquitin-like modifier-<br>activating enzyme 1 | UBA1_HUMAN | 118 | 2/2 | 1/1 | 0.19 | 0.042 |
